# Supplementary material for: In situ delivery of nanoparticles formulated with micron-sized crystals protects from murine melanoma
Source: PubMed Central journal article supplement — J Immunother Cancer. 2022 Sep 13;10(9):e004643. doi: 10.1136/jitc-2022-004643 (PMC9472128; doi:10.1136/jitc-2022-004643), 2022-09-13

(A)

**Top 30 upregulated GO biologic processes enriched with DE genes melanoma tumor cells: treated vs. control**

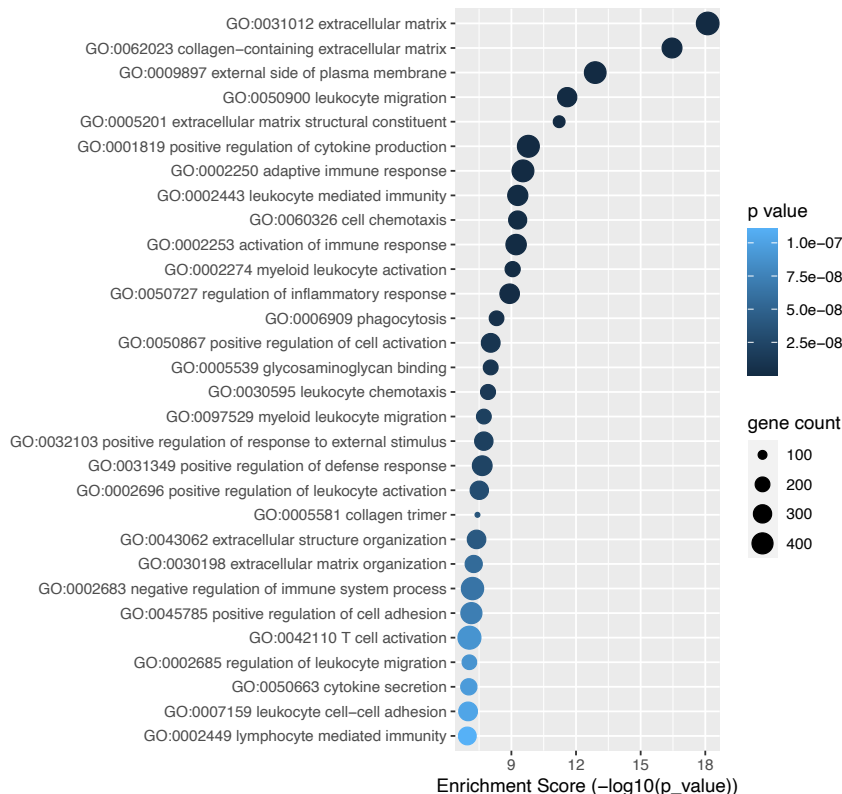

(B)

**Top 30 upregulated KEGG pathways enriched with DE genes melanoma tumor cells: treated vs. control**

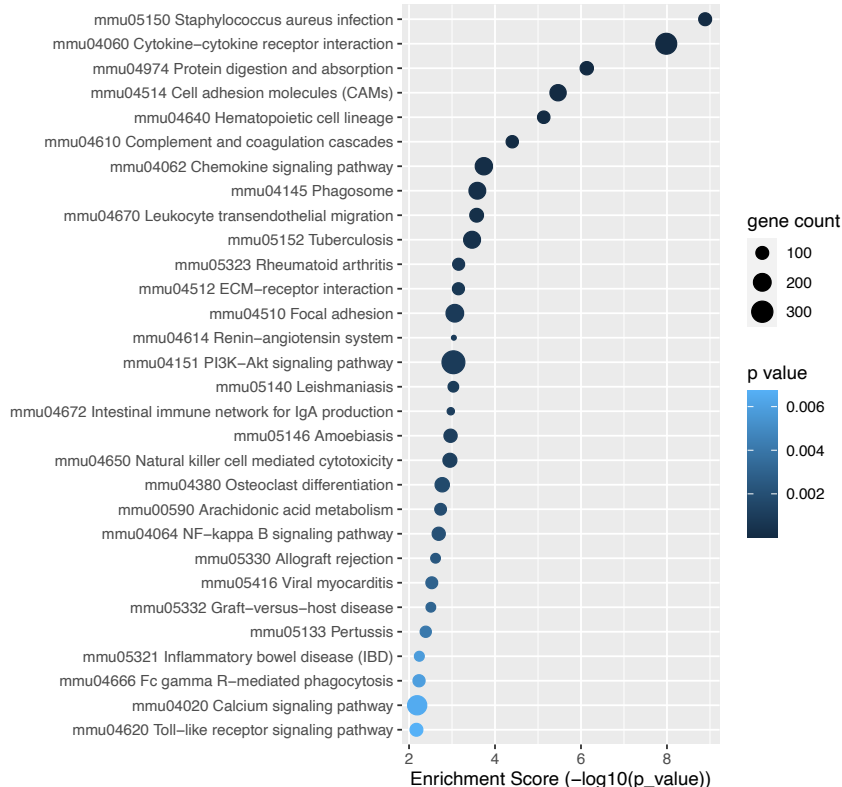

Supplement: jitc-2022-004643supp006.pdf [file jitc-2022-004643supp006.pdf]
