# Supplementary figures and images for: In situ delivery of nanoparticles formulated with micron-sized crystals protects from murine melanoma
Source: PubMed Central journal article supplement — J Immunother Cancer. 2022 Sep 13;10(9):e004643. doi: 10.1136/jitc-2022-004643 (PMC9472128; doi:10.1136/jitc-2022-004643), 2022-09-13

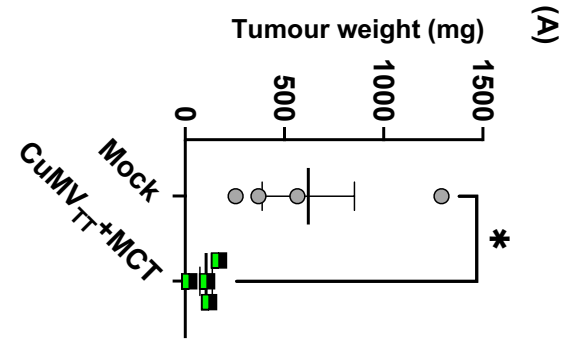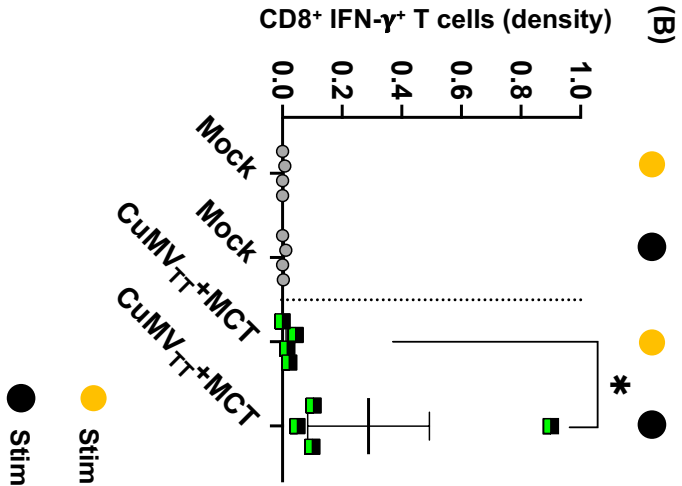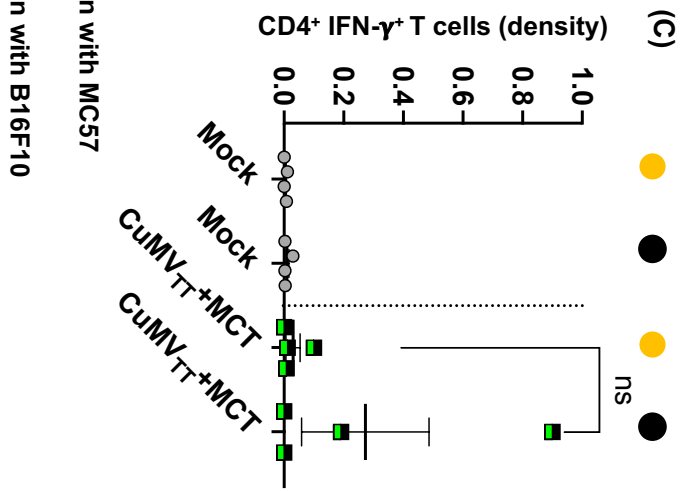

● Stimulation with MC57

● Stimulation with B16F10

Supplement: jitc-2022-004643supp002.pdf [file jitc-2022-004643supp002.pdf]

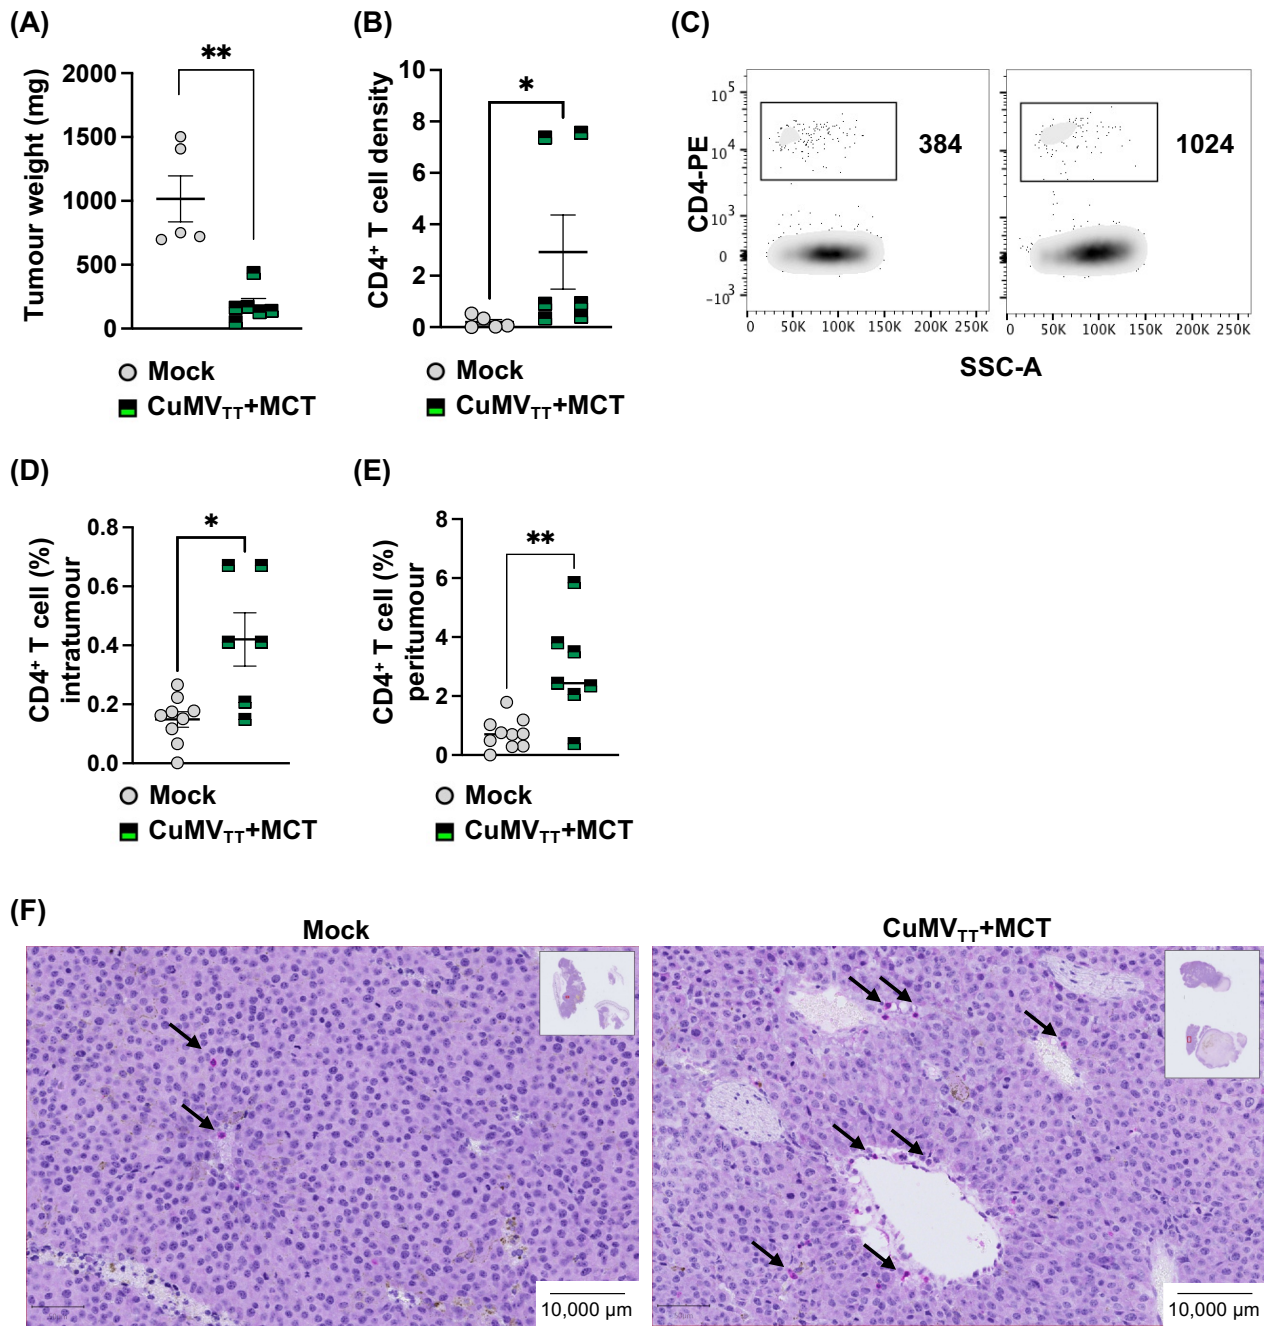

Supplement: jitc-2022-004643supp003.pdf [file jitc-2022-004643supp003.pdf]

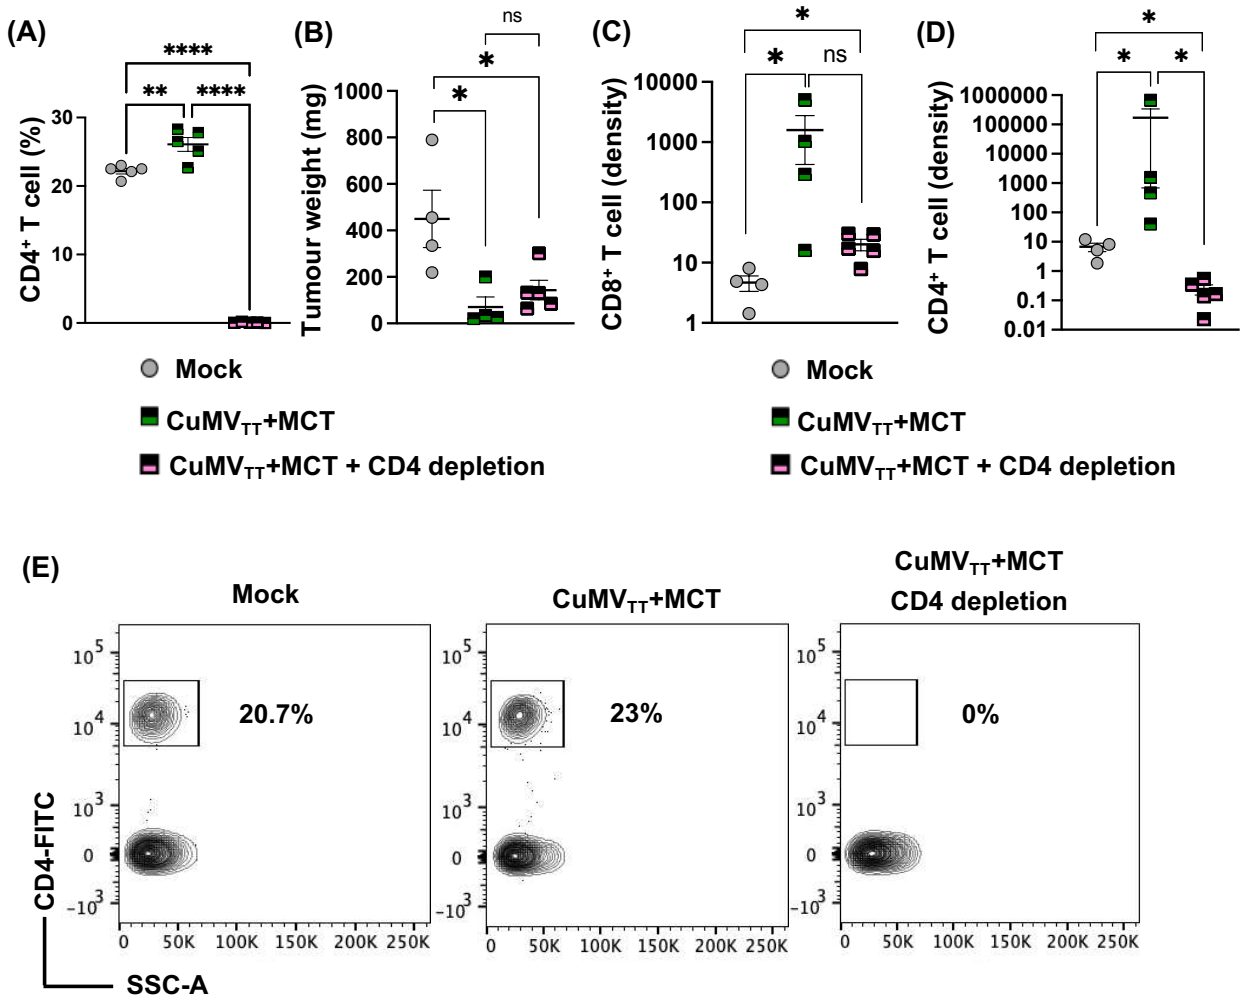

Supplement: jitc-2022-004643supp004.pdf [file jitc-2022-004643supp004.pdf]

(A)

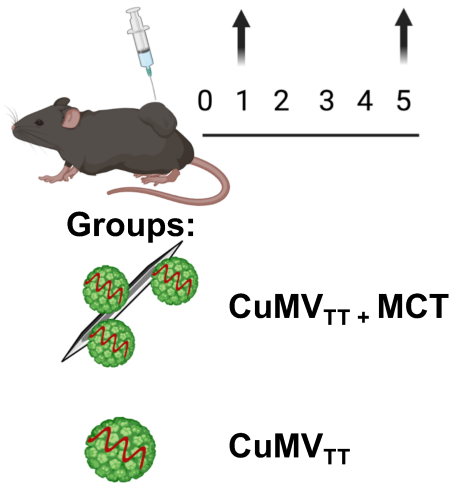

(B)

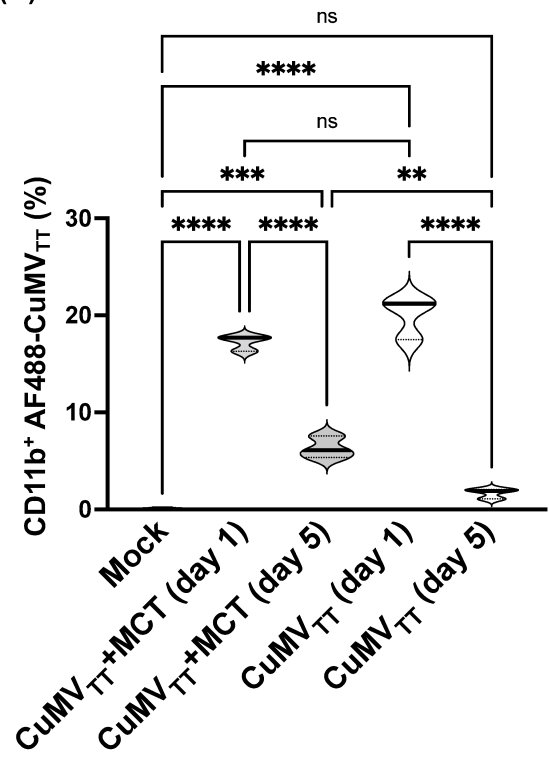

Supplement: jitc-2022-004643supp005.pdf [file jitc-2022-004643supp005.pdf]
